# Supplementary material for: A novel method to discover fluoroquinolone antibiotic resistance (qnr) genes in fragmented nucleotide sequences
Source: PubMed Central journal article supplement (PMC3543242; doi:10.1186/1471-2164-13-695), 2012-12-11

# Fragment bit scores with HMM constructed without QnrD

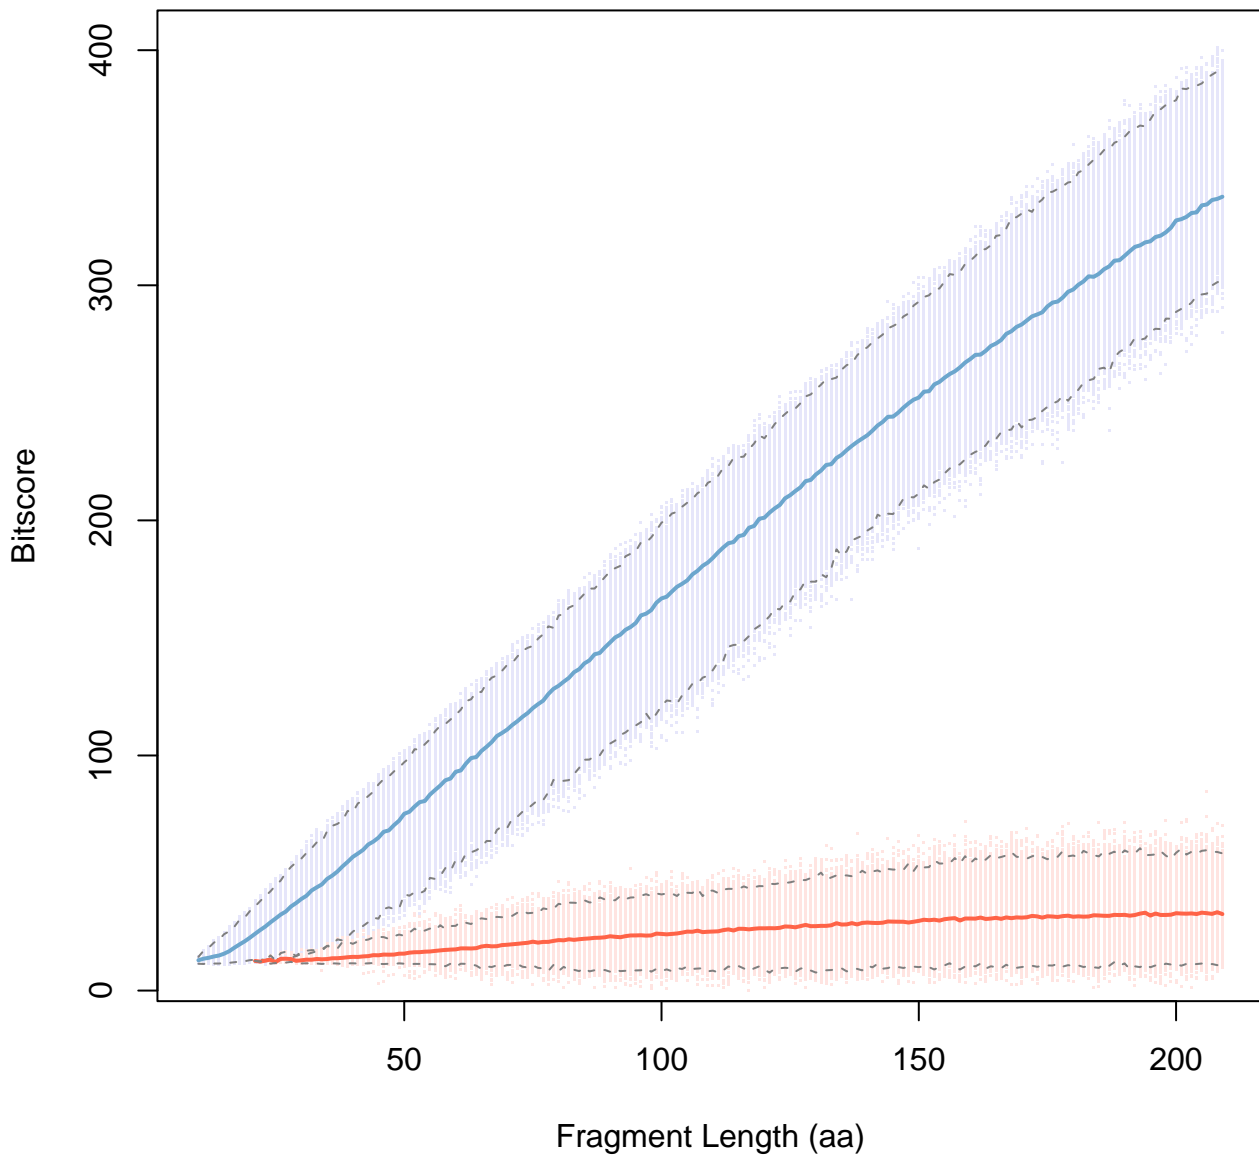

Supplement: 1471-2164-13-695-S4.pdf [file 1471-2164-13-695-S4.pdf]
